# Supplementary material for: In situ observation of transformation pathways of polymorphic forms of 1,3-dipalmitoyl-2-oleoyl glycerol (POP) examined with synchrotron radiation X-ray diffraction and DSC
Source: Royal Society of Chemistry journal article supplement (doi:10.1039/c2ce26522b), 2012-10-31
Supplement: c2ce26522b.pdf [file c2ce26522b.pdf]

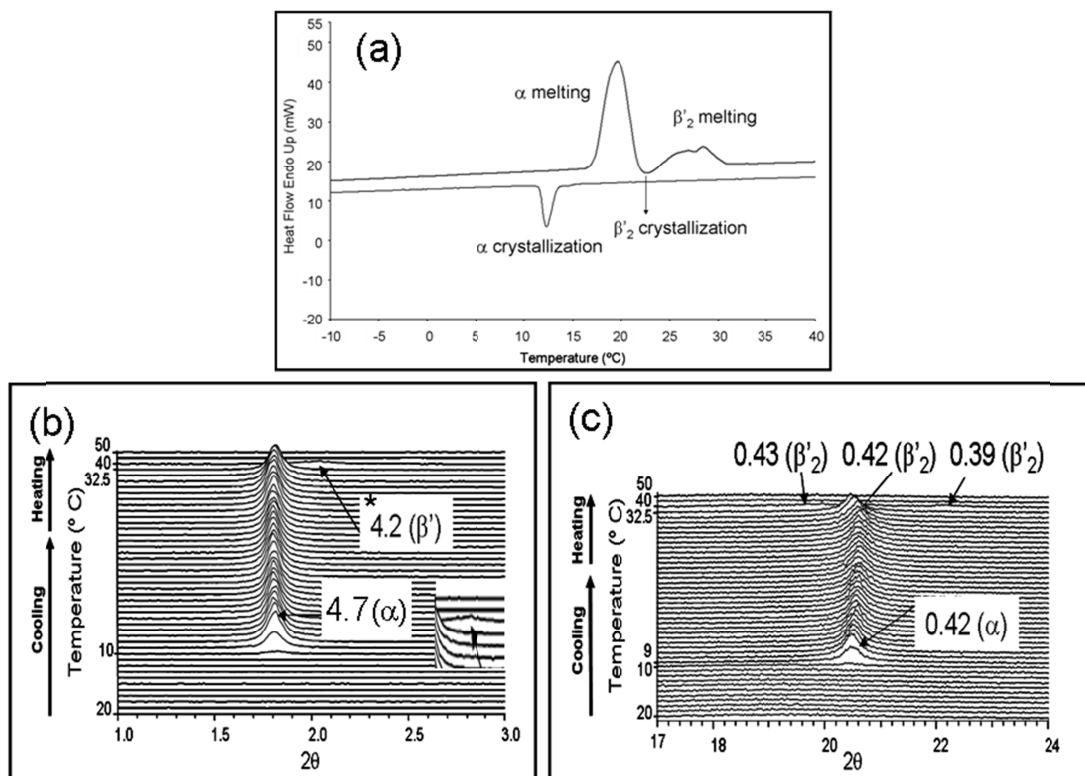

Fig. S1 showing the DSC thermogram and SR-XRD patterns obtained when POP was cooled at  $2^\circ\text{C min}^{-1}$  and heated at  $15^\circ\text{C min}^{-1}$ .
